# Supplementary material
Source: PubMed Central journal article supplement (PMC5391255)
Supplement: NIHMS858476-supplement-1.pdf [file NIHMS858476-supplement-1.pdf]

Supplementary Table 1. Bivariate correlations across all participants who had data from no more than two out of six scans excluded ( $N = 38$ ).

| Measure       | LC-MRI                 | HF-HRV                 | LF-HRV               | RMSSD                  | Trait Anxiety          | Age |
|---------------|------------------------|------------------------|----------------------|------------------------|------------------------|-----|
| LC-MRI        | -                      |                        |                      |                        |                        |     |
| Contrast      |                        |                        |                      |                        |                        |     |
| HF-HRV        | -.54**<br>[-.73, -.27] | -                      |                      |                        |                        |     |
| LF-HRV        | .13<br>[-.20, .43]     | -.12<br>[-.42, .21]    | -                    |                        |                        |     |
| RMSSD         | -.47**<br>[-.69, -.18] | .85**<br>[.73, .92]    | -.03<br>[-.35, .29]  | -                      |                        |     |
| Trait Anxiety | -.23<br>[-.51, .10]    | .27<br>[-.05, .54]     | -.40*<br>[-.64, .09] | .31†<br>[-.01, .57]    | -                      |     |
| Age           | .24<br>[-.09, .52]     | -.46**<br>[-.68, -.16] | .46**<br>[.16, .68]  | -.44**<br>[-.67, -.14] | -.44**<br>[-.67, -.14] | -   |

\*\* $p < .01$ ; \* $p < .05$ ; †  $p < .1$

Supplementary Table 2. Partial correlations controlling for age across all participants who had data from no more than two out of six scans excluded ( $N = 38$ ).

| Measure         | LC-MRI                 | HF-HRV | LF-HRV | RMSSD | Trait Anxiety |
|-----------------|------------------------|--------|--------|-------|---------------|
| LC-MRI Contrast | -                      |        |        |       |               |
| HF-HRV          | -.50**<br>[-.71, -.22] | -      |        |       |               |
| LF-HRV          | .02                    | .12    | -      |       |               |

|               |              |             |             |             |   |
|---------------|--------------|-------------|-------------|-------------|---|
|               | [-.30, .34]  | [-.21, .42] |             |             |   |
| RMSSD         | -.42*        | .82**       | .22         | -           |   |
|               | [-.65, -.12] | [.68, .90]  | [-.12, .50] |             |   |
| Trait Anxiety | -.12         | .03         | -.20        | .10         | - |
|               | [-.42, .21]  | [-.29, .35] | [-.49, .13] | [-.22, .41] |   |

\*\* $p < .01$ ; \* $p < .05$ ; †  $p < .1$

Supplementary Table 3. Bivariate correlations among younger adults who had data from no more than two out of six scans excluded ( $N = 25$ ).

| Measure         | LC-MRI       | HF-HRV      | LF-HRV      | RMSSD       | Trait Anxiety |
|-----------------|--------------|-------------|-------------|-------------|---------------|
| LC-MRI Contrast | -            |             |             |             |               |
| HF-HRV          | -.41*        | -           |             |             |               |
|                 | [-.69, -.02] |             |             |             |               |
| LF-HRV          | .03          | .31         | -           |             |               |
|                 | [-.37, .42]  | [-.10, .63] |             |             |               |
| RMSSD           | -.32         | .82**       | .38†        | -           |               |
|                 | [-.64, .09]  | [.63, .92]  | [-.02, .67] |             |               |
| Trait Anxiety   | -.08         | .04         | -.22        | .09         | -             |
|                 | [-.46, .33]  | [-.36, .43] | [-.57, .19] | [-.32, .47] |               |

\*\* $p < .01$ ; \* $p < .05$ ; †  $p < .1$ ; ‡  $p = .1$

Supplementary Table 4. Bivariate correlations among older adults who had data from no more than two out of six scans excluded ( $N = 13$ ).

| Measure         | LC-MRI                 | HF-HRV              | LF-HRV              | RMSSD              | Trait Anxiety |
|-----------------|------------------------|---------------------|---------------------|--------------------|---------------|
| LC-MRI Contrast | -                      |                     |                     |                    |               |
| HF-HRV          | -.65**<br>[-.88, -.15] | -                   |                     |                    |               |
| LF-HRV          | -.02<br>[-.56, .54]    | -.22<br>[-.69, .38] | -                   |                    |               |
| RMSSD           | -.58*<br>[-.86, -.04]  | .81**<br>[.47, .94] | -.06<br>[-.59, .51] | -                  |               |
| Trait Anxiety   | -.29<br>[-.72, .31]    | .07<br>[-.50, .60]  | -.16<br>[-.65, .43] | .22<br>[-.38, .69] | -             |

\*\* $p < .01$ ; \* $p < .05$ ; †  $p < .1$ ;
